# Supplementary material
Source: PubMed Central journal article supplement (PMC11526090)

**Ebeiedinone and peimisine inhibit cigarette smoke extract-induced  
oxidative stress injury and apoptosis in BEAS-2B cells**

**Chuanlan Liu<sup>1,2</sup>. Xiaomu Zhu<sup>3</sup>. Erbu Aga<sup>1</sup>, Wai Ming Tse<sup>5</sup>. Kathy Wai Gaun Tse<sup>5</sup>.  
Yanyong Liu<sup>2,4</sup>. Bengui Ye<sup>1,2</sup>**

<sup>1</sup> Medical College of Tibet University, Lasa 850002, China

<sup>2</sup> Key Laboratory of Drug-Targeting and Drug Delivery System of the Education Ministry, Sichuan Engineering Laboratory for Plant-Sourced Drug, and Sichuan Research Center for Drug Precision Industrial Technology, West China School of Pharmacy, Sichuan University, Chengdu 610041, China

<sup>3</sup> Department of Pharmacy, West China Hospital of Sichuan University, Chengdu 610041, Sichuan, China

<sup>4</sup> Institute of Basic Medical Sciences, Peking Union Medical College, Beijing 100005, China

<sup>5</sup> Nin Jiom Medicine Manufactory (H.K.) Limited, Hong Kong, PR China

Chuanlan Liu and Xiaomu Zhu contributed equally to this work.

**Correspondence to** Bengui Ye, West China School of Pharmacy, Sichuan University, No.17, Section 3, Renmin South Road, Wuhou District, Chengdu, Sichuan, China.

**Email:** benguiye513@163.com

Supplementary dates consist of Supplementary Figures 1–4 and Tables 1–3.

### Supplementary Figures

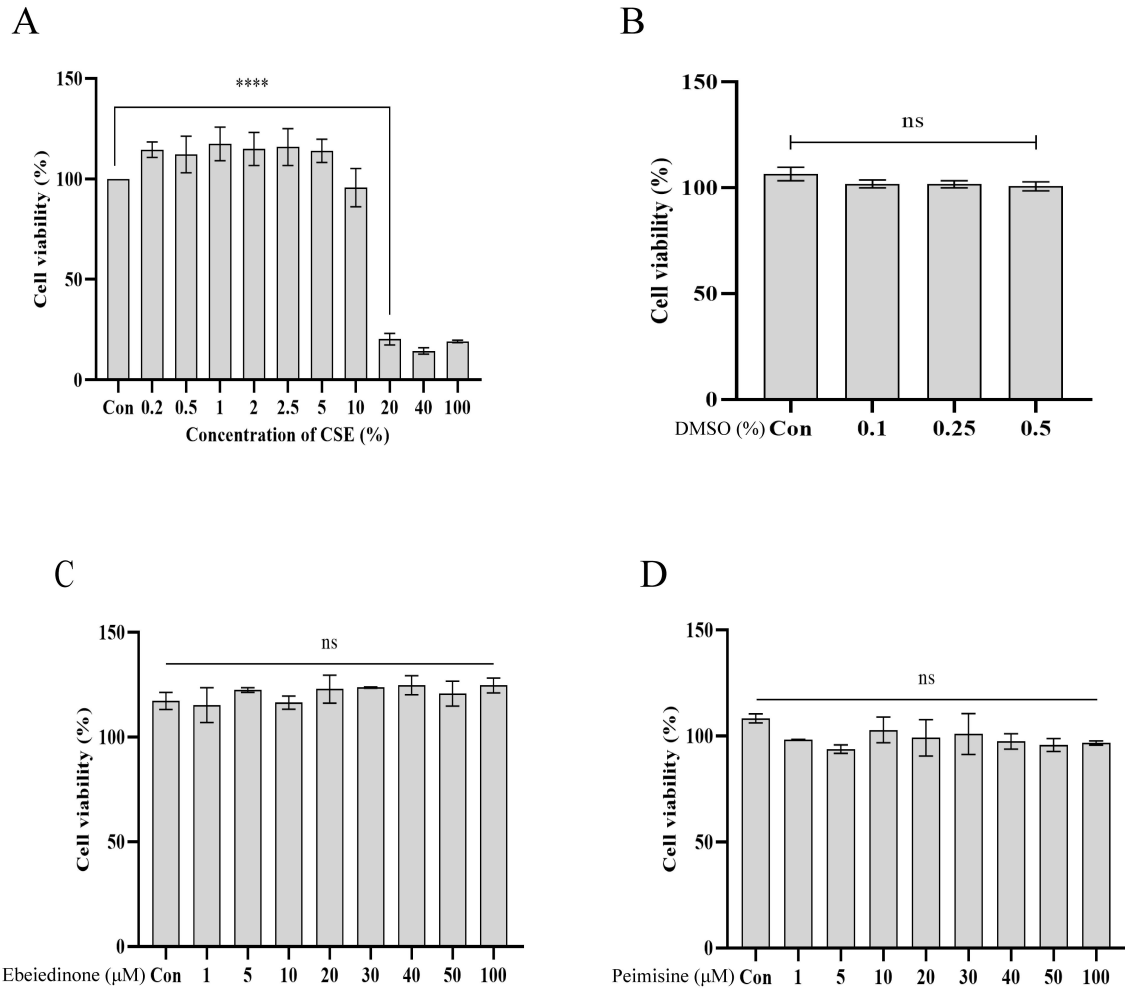

**Supplementary Fig. 1. The cytotoxicity was caused by CSE, DMSO, ebeiedinone, and peimisine.** (A) Effect of CSE on cell viability in BEAS-2B cells. (B) Effect of DMSO on cell viability in BEAS-2B cells. (C and D) Effects of ebeiedinone and peimisine on cell viability in BEAS-2B cells. The data are represented as the mean  $\pm$  SD of three independent experiments. In (A)–(D), the data are mean  $\pm$  SD ( $n = 3$ ). \*\*\*\* $P < 0.0001$  compared with the control group; *ns*=not significant.

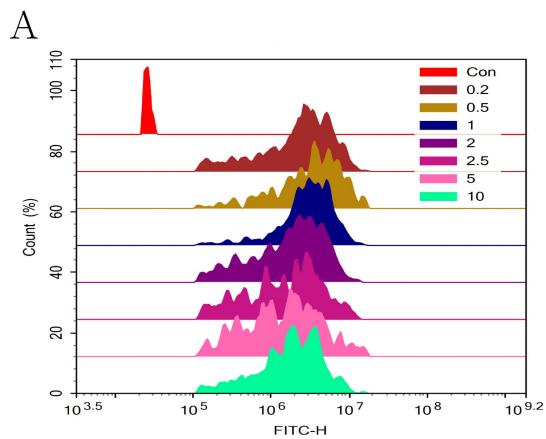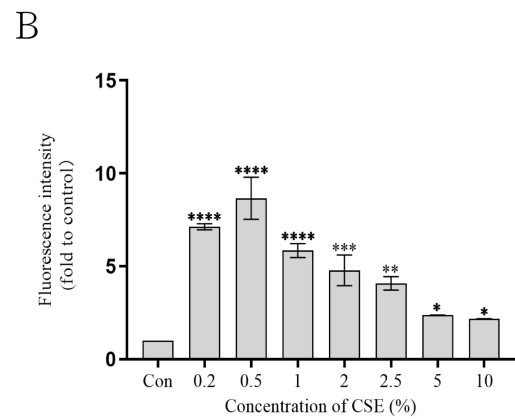

**Supplementary Fig. 2. Effects of CSE exposure on ROS production in BEAS-2B cells.** The cells were treated with 0-10% CSE for 24 h. Cells were washed, trypsinized, centrifuged, incubated with 10 $\mu$ M DCFDA fluorescent probe for 25 min, and analyzed by FACS. The data are represented as the mean  $\pm$  SD of three independent experiments. ### $P$ <0.0001 compared with the control group. \* $P$ <0.05, \*\* $P$ <0.01, \*\*\* $P$ <0.001, and \*\*\*\* $P$ <0.0001 compared with the control group.

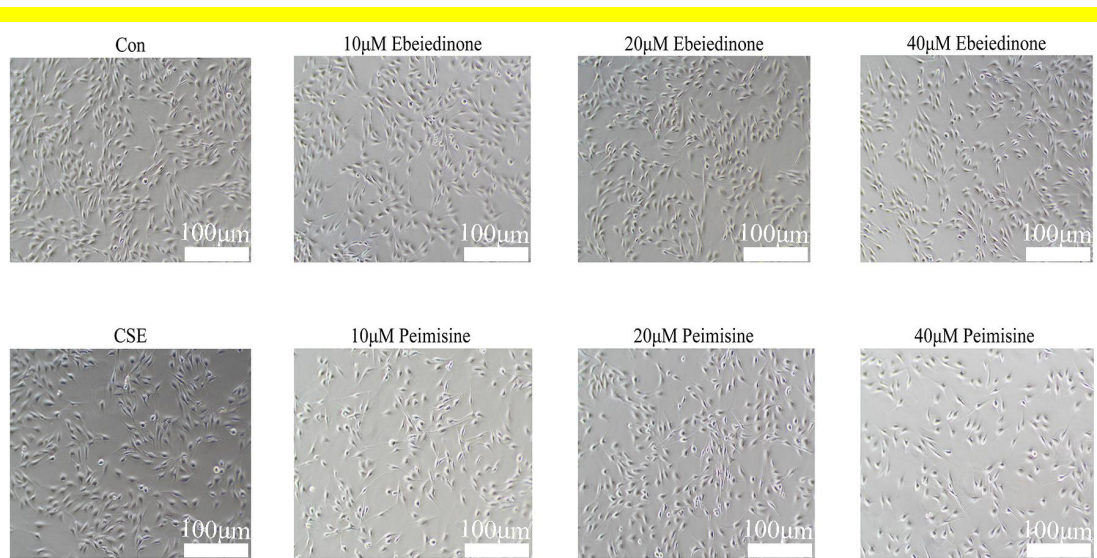

**Supplementary Fig. 3. Effects of ebeiedinone and peimisine on the cell morphology of BEAS-2B cells damaged by CSE.** BEAS-2B cells were cultured with CSE (0.5%), ebeiedinone, and peimisine (10, 20, and 40 μM) for 24 h, and then the images were obtained (10×magnification).

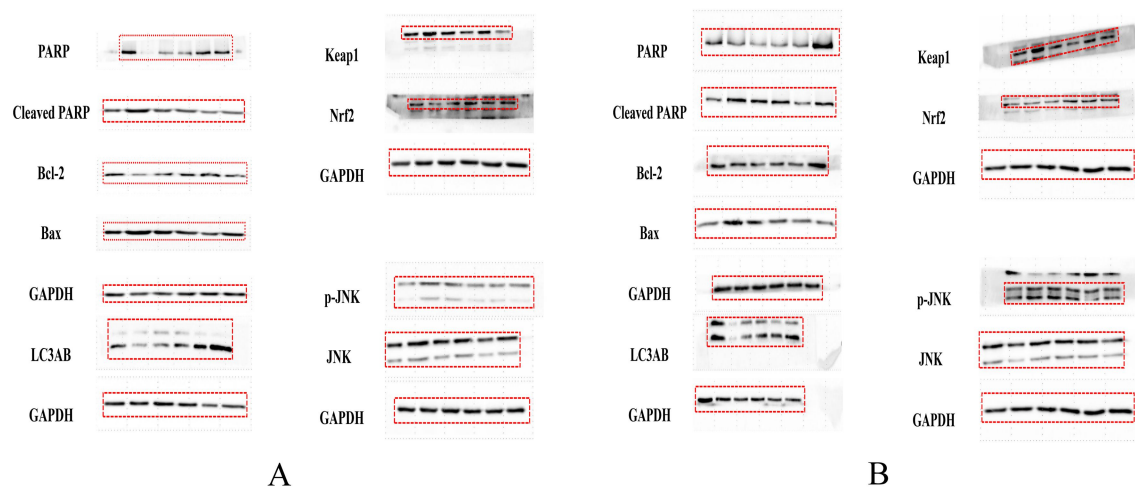

**Supplementary Fig. 4. Original image for checking. (A)**The gel blot images of ebeiedinone. **(B)**The gel blot images of peimisine.

## Supplementary Tables

### Supplementary Tables 1. Antibodies used for western blot analysis.

| Antibody     | Dilution | Catalog no | Company                              |
|--------------|----------|------------|--------------------------------------|
| Bax          | 1:1000   | ET1603-34  | Huaan Biotechnology, Hangzhou,China  |
| Bcl-2        | 1:1000   | ET1603-11  | Huaan Biotechnology, Hangzhou,China  |
| PARP         | 1:1000   | 9531       | Cell Signaling Technology, MA, USA   |
| Cleaved-PARP | 1:1000   | 5625       | Cell Signaling Technology, MA, USA   |
| LC3A/B       | 1:1000   | 12741      | Cell Signaling Technology, MA, USA   |
| Keap1        | 1:1000   | AF5266     | Affinity Biosciences, Jiangsu, China |
| Nrf2         | 1:1000   | AF0639     | Affinity Biosciences, Jiangsu, China |
| JNK          | 1:1000   | 9252       | Cell Signaling Technology, MA, USA   |
| P-JNK        | 1:1000   | AP1337     | ABclonal, Wuhan, China               |

**Supplementary Tables 2. The analysis and NMR spectrum of ebeiedinone.**

---

|                    |                                                   |
|--------------------|---------------------------------------------------|
| <b>Description</b> | <b>Ebeiedinone</b>                                |
| <b>CAS No.</b>     | <b>25650-68-4</b>                                 |
| <b>MF</b>          | <b>C<sub>27</sub>H<sub>43</sub>NO<sub>2</sub></b> |
| <b>MW</b>          | <b>413.64</b>                                     |
| <b>Lot No.</b>     | <b>MUST-22031506</b>                              |
| <b>Report Date</b> | <b>2021-03-15</b>                                 |

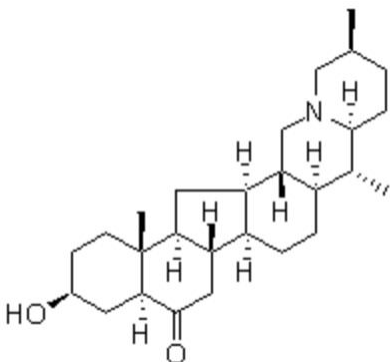

**TEST ITEM AND RESULT**

| <b>Item</b>           | <b>Standard</b>     | <b>Result</b>   | <b>REMARKS</b> |
|-----------------------|---------------------|-----------------|----------------|
| <b>Appearance</b>     | <b>White Powder</b> | <b>Conforms</b> |                |
| <b>Loss on drying</b> | <b>≤ 2.0%</b>       | <b>Conforms</b> |                |
| <b>Assay by HPLC</b>  | <b>≥ 98%</b>        | <b>99.63%</b>   |                |

**ATTENTION**

|                 |                                                                                                                                                                                                                       |
|-----------------|-----------------------------------------------------------------------------------------------------------------------------------------------------------------------------------------------------------------------|
| <b>Storage</b>  | <b>Keep tightly sealed and store under dry and dark conditions.</b><br><b>Recommended storage temperature: below 4°C, special varieties below -20°C.</b>                                                              |
| <b>Warranty</b> | <b>Two years</b>                                                                                                                                                                                                      |
| <b>Usage</b>    | <b>Because some compounds may change at room temperature after dissolved in solvents, please use the dissolved sample early. Chromatographic pure reagents are recommended to dissolve samples for HPLC analysis.</b> |
| <b>Note</b>     | <b>In case of quality problem, please contact us within 15 days after receiving the products.</b>                                                                                                                     |

---

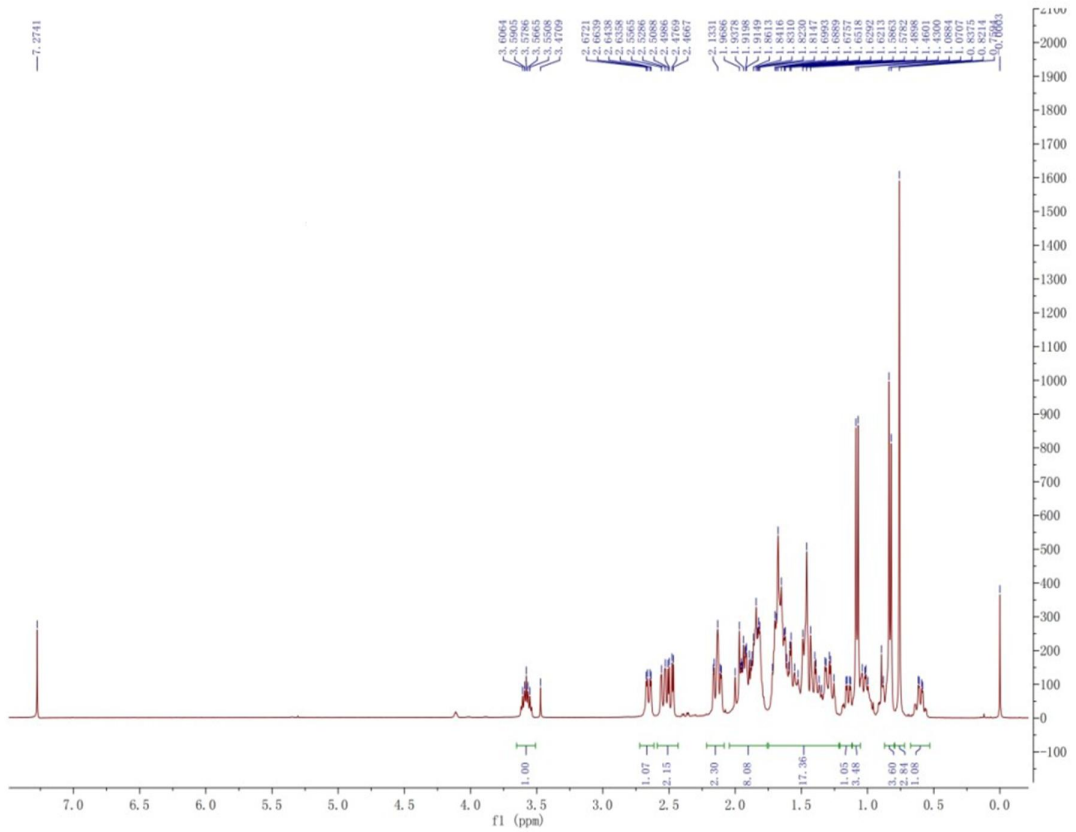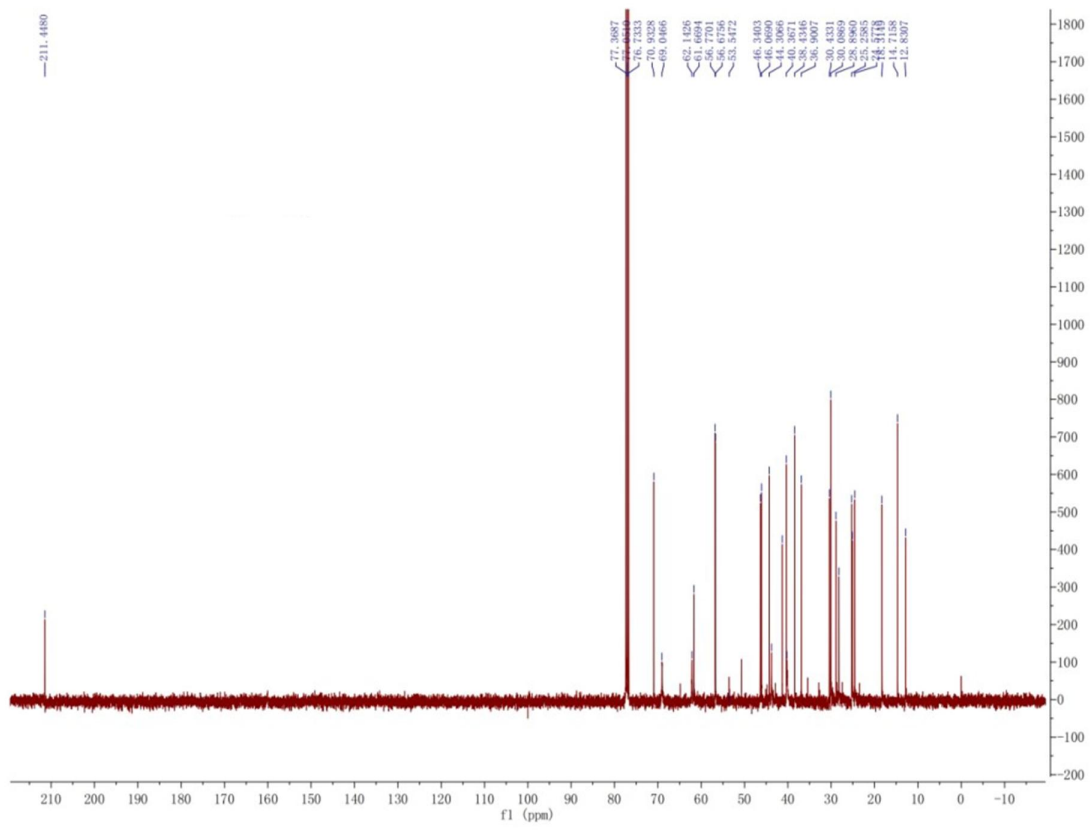



### Supplementary Tables 3. The analysis and NMR spectrum of peimisine.

|             |                                                 |
|-------------|-------------------------------------------------|
| Description | Peimisine                                       |
| CAS No.     | 19773-24-1                                      |
| MF          | C <sub>27</sub> H <sub>41</sub> NO <sub>3</sub> |
| MW          | 427.31                                          |
| Lot No.     | MUST-22032810                                   |
| Report Date | 2022-03-28                                      |

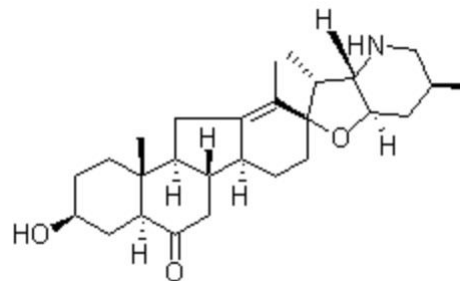

#### TEST ITEM AND RESULT

| Item           | Standard     | Result   | REMARKS |
|----------------|--------------|----------|---------|
| Appearance     | White Powder | Conforms |         |
| Loss on drying | ≤ 2.0%       | Conforms |         |
| Assay by HPLC  | ≥ 98%        | 99.60%   |         |

#### ATTENTION

|          |                                                                                                                                                                                                                |
|----------|----------------------------------------------------------------------------------------------------------------------------------------------------------------------------------------------------------------|
| Storage  | Keep tightly sealed and store under dry and dark conditions.<br>Recommended storage temperature: below 4°C, special varieties below -20°C.                                                                     |
| Warranty | Two years                                                                                                                                                                                                      |
| Usage    | Because some compounds may change at room temperature after dissolved in solvents, please use the dissolved sample early. Chromatographic pure reagents are recommended to dissolve samples for HPLC analysis. |
| Note     | In case of quality problem, please contact us within 15 days after receiving the products.                                                                                                                     |

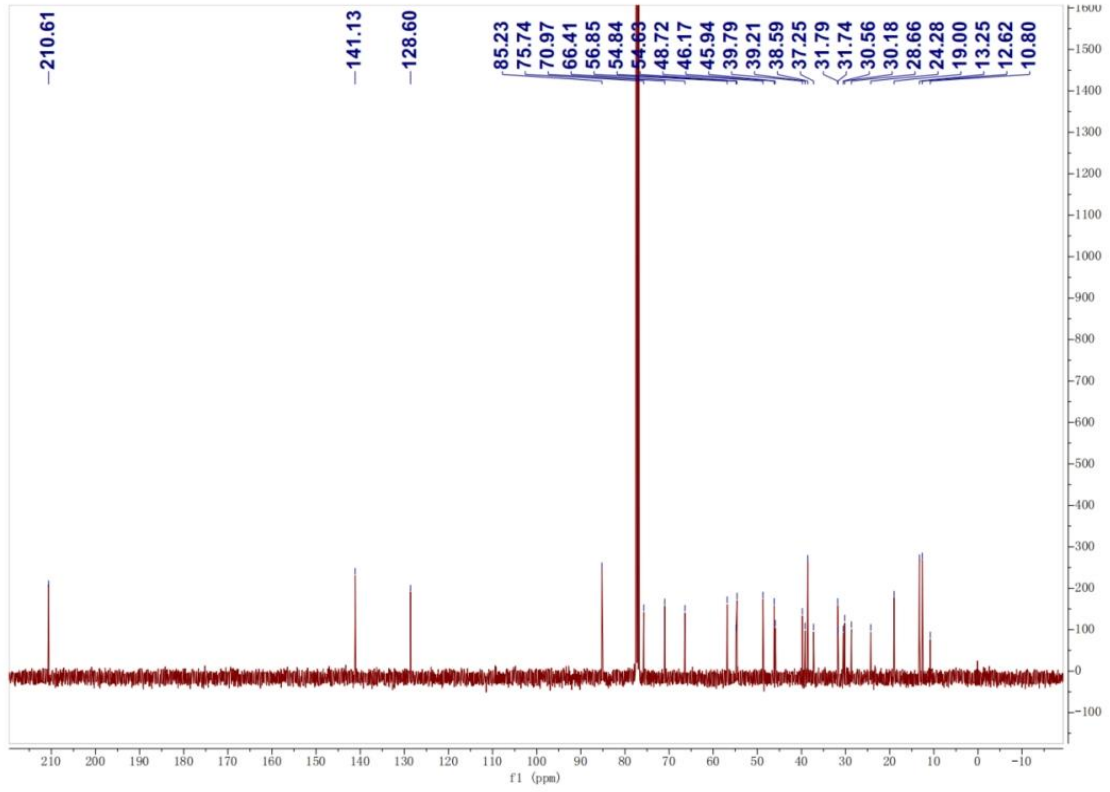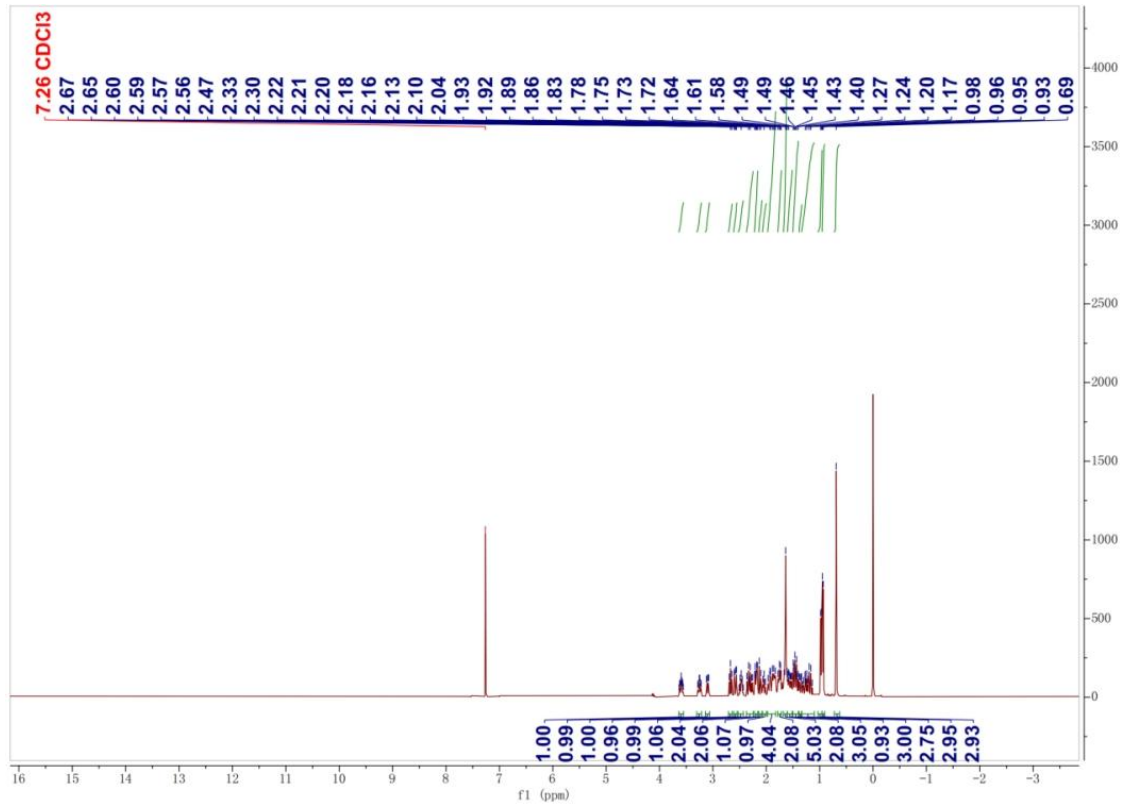

Supplement: mmc1.pdf [file mmc1.pdf]
